# Supplementary material for: Semi–Selective Fatty Acyl Reductases from Four Heliothine Moths Influence the Specific Pheromone Composition
Source: PLoS One. 2012 May 16;7(5):e37230. doi: 10.1371/journal.pone.0037230 (PMC3353883; doi:10.1371/journal.pone.0037230)
Supplement: Table S1 — Primers used to amplify the partial and full-length sequences of of HvFAR, HsFAR, HarFAR, and HasFAR. * The primers pFlHvFARs, pFlHsFARs, and pFlHarFARs, contains an additional Kozak-sequence (small letters) to promote expression efficiency when performing the functional assay. Start codons are emphasized in bold letters. 1 GSP used for ORF amplification. 2 GSP primer internal for HvFAR, used to amplify the partial HasFAR sequence. 3 Degenerate primers for the 3′ region of the pgFARs. 4 Primers for RACE amplification. 5 GSP for amplification of internal region of HasFAR. 6 Primers for sequencing inserts in the pYES2.1 vector. (XLSX) [file pone.0037230.s001.xlsx]

## Sheet: Blad1
Primer Name	Primer Sequence (5’à 3’)
pFlHvFARs1	gcgATGGTTGTTTTGACTTCTAAAGAAACGAAACC
pFlHvFARas1	ATTTTTTACGTTTTTTTCTCCAAAAAATTTCGGACGCCCC
pFlHsFARs1	gcgATGGTCGTGTTGACTTCG
pFlHsFARas1	GGTTTGTGCTTTAGAAATTTAACGG
pFlHarFARs1	gcgATGGTCGTTTTAACTTC
pFlHarFARas1	GCCGTTTCTATTTATTTATTCGTAG
pFlHasFARas1	CGTTTCCATTTATTTATTCGTTG
HvFAR1078_710R2	CGGGAGAAAGAGACGCATAC
HFAR3URTI3	NNNRATTNTATWTATTTNTT
HFAR3URTII3	CAMATTNTACNGTCCYTRAA
HFAR3URTIII3	ATAKTKWCAWCAAAAWAA
Harsu3primI4	TCTTCAATCGACTTCTTCACGA
Harsu3primII4	TGGGTGATGAAGGCAGACAGAG
pHsFAR3race4	CTGTACAGGCACTTGATTGGG
HviFAR3UTR3	TGCTCAACCTCCATACTATACAGTCC
Harsu5primI4	ACAGAAGTTTTTCTATGAATACC
Harsu5primII4	CGATATCTGGACAGCTATACAG
pHasFAR5race4	CATTCTTCGACTCAAGCCAGC
pHasFARintrl5	CGATGCCATCAAACAGAAGTCG
Gal16	AATATACCTCTATACTTTAACGTC
V56	ACCGAGGAGAGGGTTAGGGAT
